# Supplementary material for: The relationship betweenHelicobacter pyloriseropositivity and COPD
Source: HighWire-hosted journal article supplement (doi:10.1136/thoraxjnl-2015-207059), 2015-05-29
Supplement: thoraxjnl-2015-207059supp.pdf [file thoraxjnl-2015-207059supp.pdf]

**Does an Association Exist between Helicobacter pylori Seropositivity and Chronic  
Obstructive Pulmonary Disease?**

Marc A Sze, Yu-Wei Roy Chen, Sheena Tam, Donald Tashkin, Robert A. Wise, John E.  
Connett, S.F. Paul Man, Don D. Sin

**ONLINE DATA SUPPLEMENT**

**Table S1:** Patient Characteristic Overview

| n    | Age  | Sex<br>(% Male) | Smoking<br>Start<br>(years) | Pack Years  | BMI        | Height<br>(cm) | Age at 5<br>year follow<br>up |
|------|------|-----------------|-----------------------------|-------------|------------|----------------|-------------------------------|
| 4765 | 53.5 | 63.1            | 17.5 ± 3.8                  | 40.2 ± 18.7 | 25.6 ± 3.9 | 171.8 ± 9.6    | 53.5 ± 6.8                    |

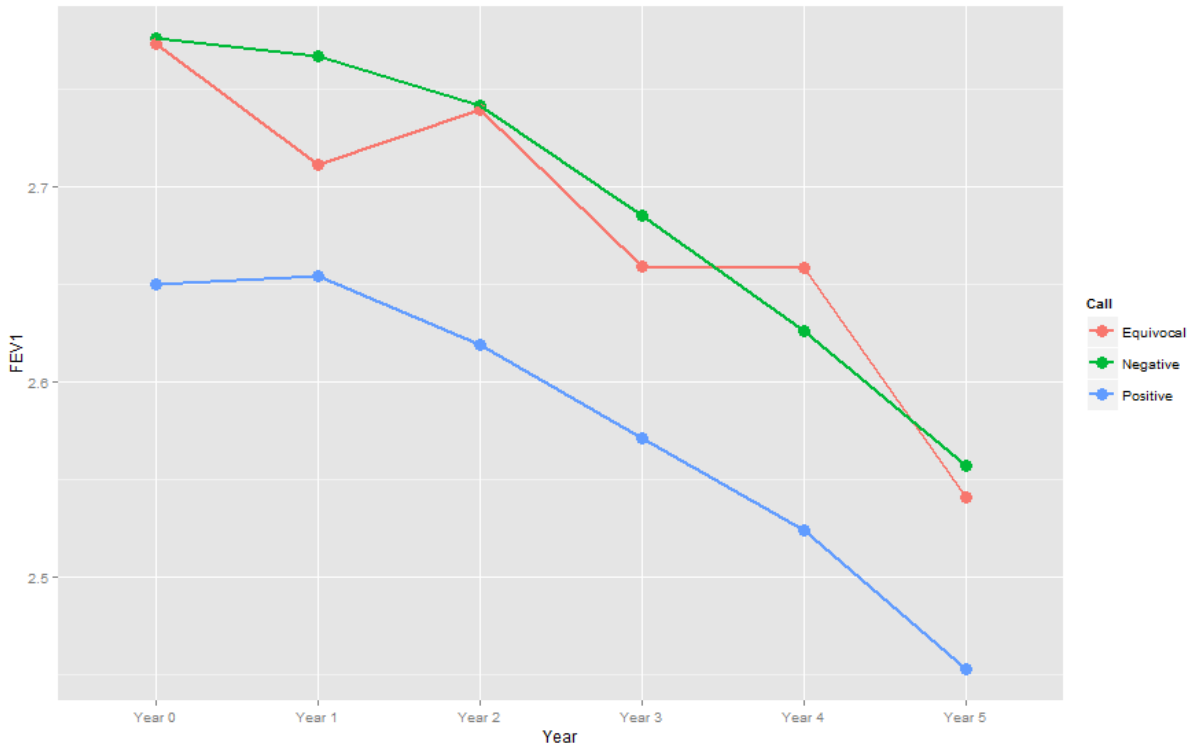

**Figure S1: Three group plot of FEV1 (L) versus year for negative (<15 DU/mL), equivocal (15-18DU/mL), and positive (>18 DU/mL)**

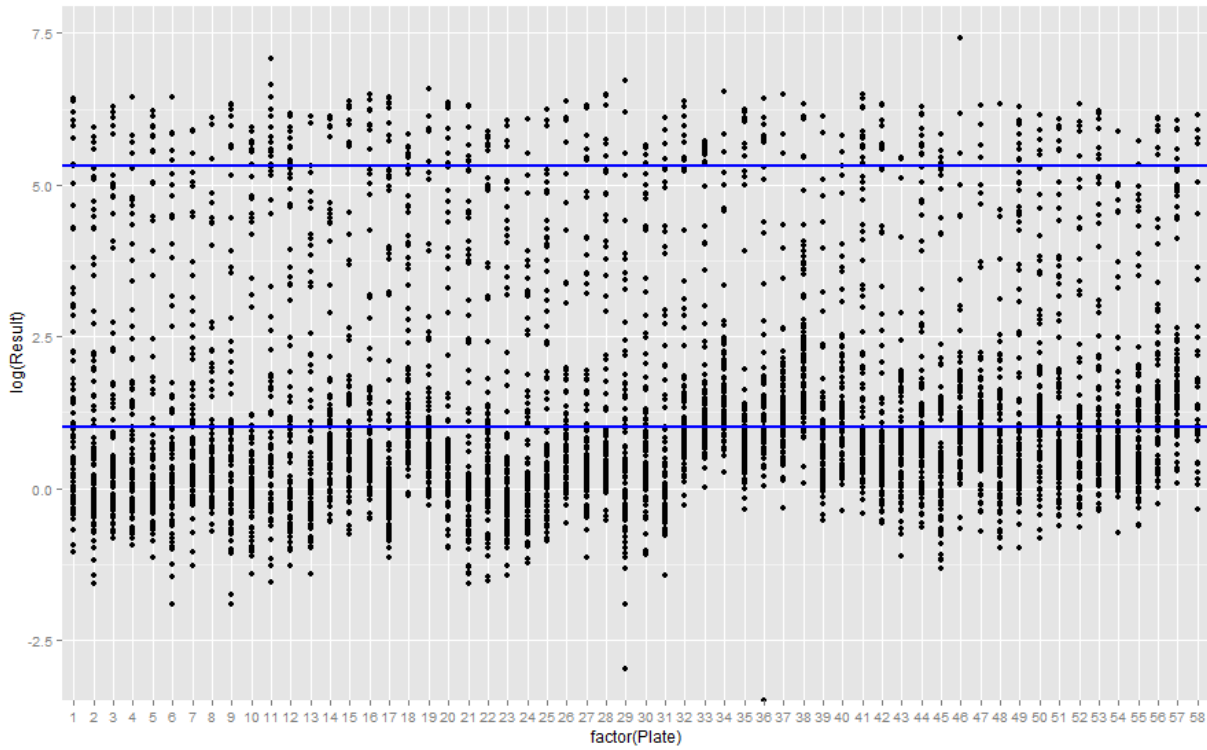

**Figure S2: Natural log distribution of H.pylori measurements across all 58 ELISA plates.** The lower blue line is the mean of the H.pylori negative individuals and the top blue line is the mean of the H.pylori positive individuals.

**Table S2:** Multiple regression model of height (in meters) versus age, sex, *H.pylori* IgG levels, median income, and years of education.

| Variable                    | Estimate               | Std.Error            | T-value | P-value              |
|-----------------------------|------------------------|----------------------|---------|----------------------|
| Years of Education          | 1.9x10 <sup>-1</sup>   | 4.2x10 <sup>-2</sup> | 4.5     | 8.7x10 <sup>-6</sup> |
| Median Income (US dollars)  | 1.1x10 <sup>-5</sup>   | 9.9x10 <sup>-6</sup> | 1.1     | 0.25                 |
| <i>H.Pylori</i> IgG (DU/mL) | -6.73x10 <sup>-2</sup> | 6.0x10 <sup>-2</sup> | -1.1    | 0.26                 |
| Males (versus females)      | 0.13                   | 0.23                 | 56.7    | 2x10 <sup>-16</sup>  |
| Age (years)                 | -9.8x10 <sup>-2</sup>  | 1.6x10 <sup>-2</sup> | -5.9    | 3.1x10 <sup>-9</sup> |

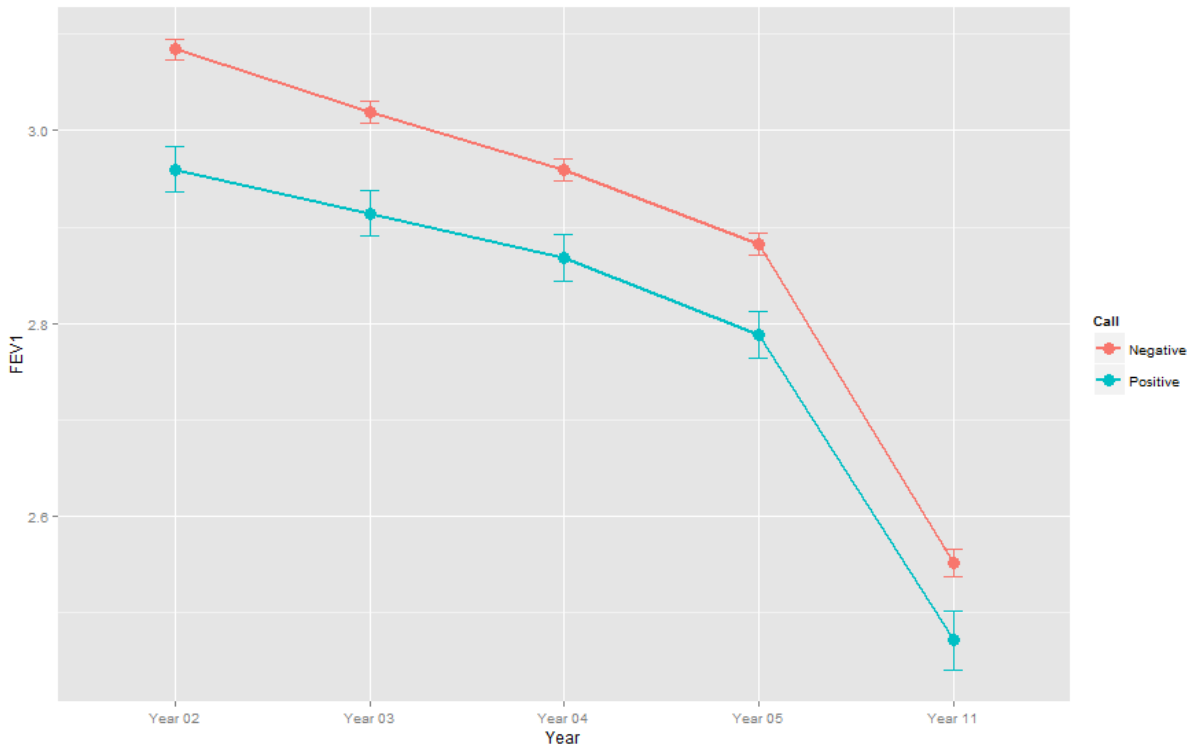

**Figure S3: FEV1 in Males based on H.pylori positivity or negativity.**

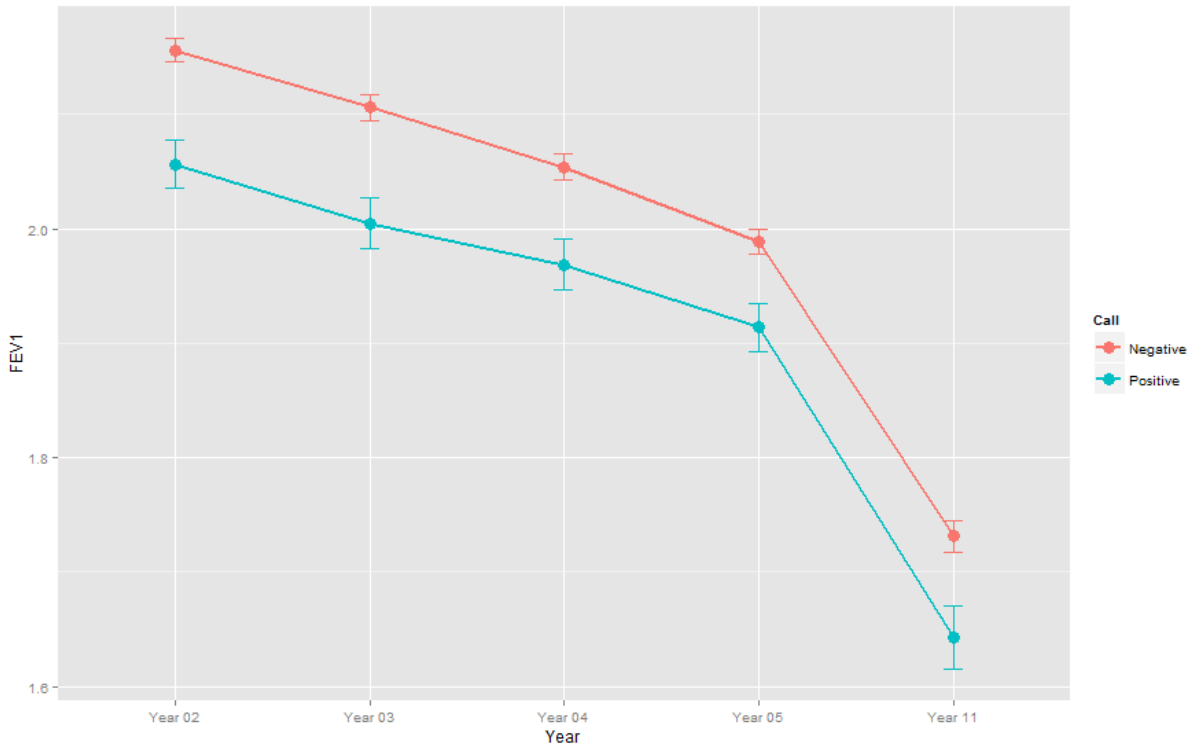

**Figure S4: FEV1 in females based on H.pylori positivity or negativity.**

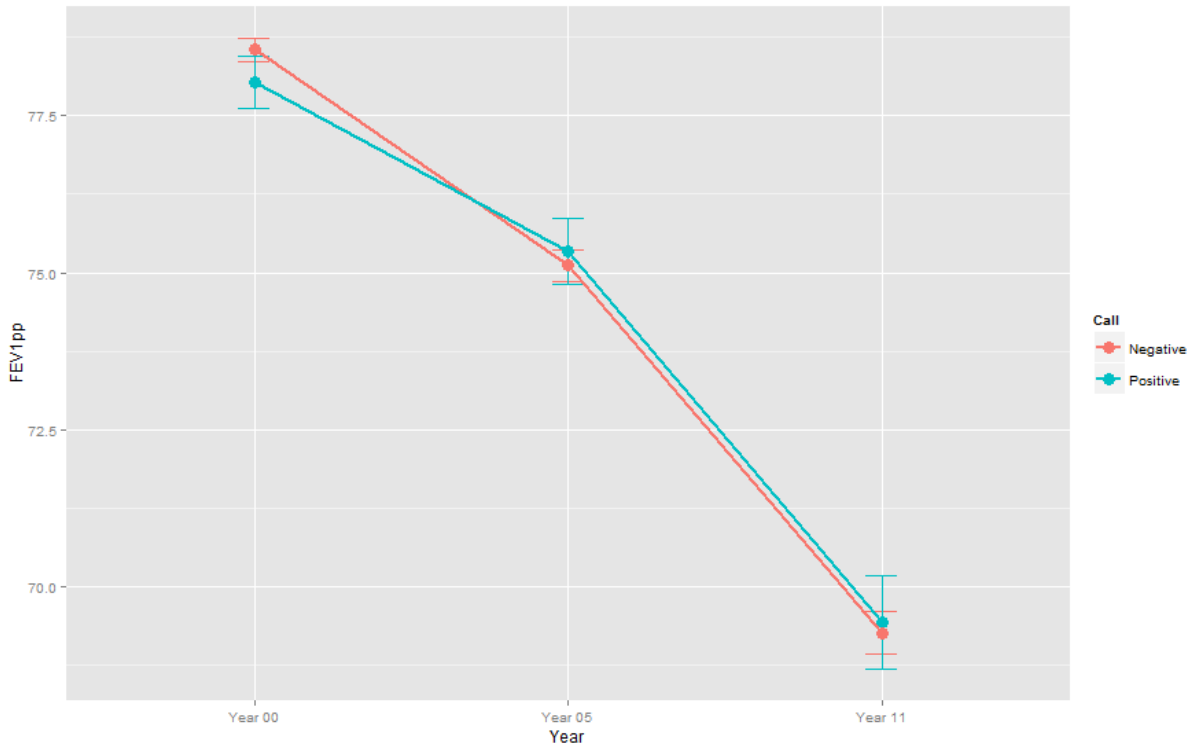

**Figure S5: FEV1pp in males based on H.pylori positivity or negativity**



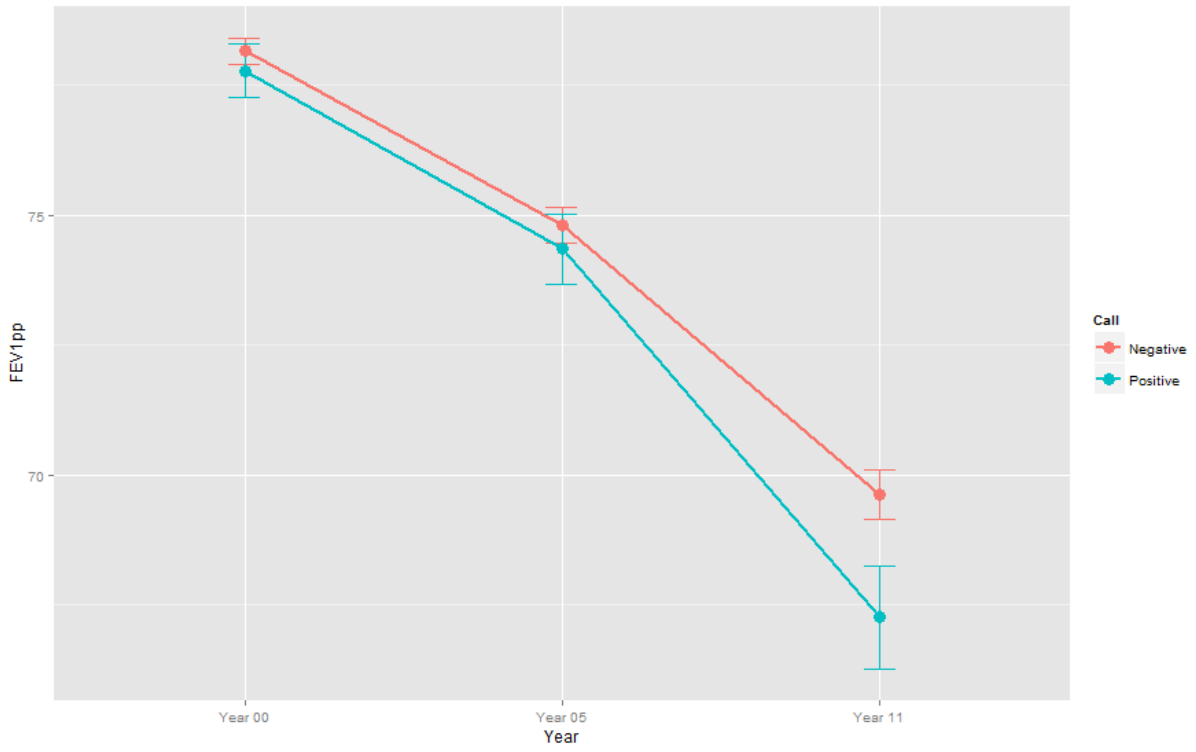

**Figure S6: FEV1pp in females based on H.pylori positivity or negativity**
